# Supplementary material
Source: Research Square preprint supplement (doi:10.21203/rs.3.rs-8825752/v1)
Supplement: Supplementary file 1 [file 18ffb92286fe8c5d5eb3fc72.docx]

# Appendix

1. Physician activities

| Time-Block | Administrative work (AD) | Coordination & Communication (CC) | Direct patient care (DC) | Indirect clinical work (IND) | Travel (TR) | Waiting (WW) |
| --- | --- | --- | --- | --- | --- | --- |
| 8:30 | 5 | 0 | 0 | 0 | 0 | 0 |
| 9:00 | 1 | 0 | 0 | 1 | 0 | 0 |
| 9:15 | 0 | 0 | 0 | 0 | 1 | 0 |
| 9:30 | 0 | 0 | 0 | 0 | 1 | 0 |
| 9:45 | 0 | 0 | 0 | 1 | 0 | 0 |
| 10:00 | 0 | 0 | 0 | 9 | 0 | 0 |
| 10:15 | 0 | 0 | 0 | 4 | 0 | 0 |
| 10:30 | 2 | 0 | 1 | 1 | 1 | 0 |
| 10:45 | 0 | 0 | 7 | 8 | 2 | 0 |
| 11:00 | 0 | 2 | 7 | 5 | 1 | 2 |
| 11:15 | 1 | 1 | 12 | 8 | 2 | 0 |
| 11:30 | 0 | 0 | 5 | 5 | 0 | 0 |
| 11:45 | 0 | 0 | 9 | 8 | 1 | 0 |
| 12:00 | 0 | 0 | 7 | 4 | 1 | 0 |
| 12:15 | 0 | 1 | 12 | 4 | 2 | 0 |
| 12:30 | 1 | 0 | 9 | 7 | 1 | 0 |
| 12:45 | 0 | 0 | 9 | 5 | 0 | 0 |
| 13:00 | 0 | 0 | 6 | 3 | 1 | 0 |
| 13:15 | 0 | 0 | 3 | 0 | 1 | 0 |
| 13:30 | 0 | 0 | 9 | 2 | 2 | 0 |
| 13:45 | 0 | 0 | 4 | 1 | 2 | 0 |
| 14:00 | 0 | 0 | 10 | 3 | 1 | 0 |
| 14:15 | 0 | 1 | 6 | 6 | 2 | 0 |
| 14:30 | 0 | 2 | 15 | 3 | 2 | 0 |
| 14:45 | 0 | 0 | 12 | 6 | 0 | 0 |
| 15:00 | 0 | 1 | 3 | 4 | 2 | 1 |
| 15:15 | 1 | 0 | 5 | 8 | 0 | 0 |
| 15:30 | 0 | 1 | 16 | 11 | 0 | 0 |
| 15:45 | 0 | 3 | 6 | 7 | 2 | 0 |
| 16:00 | 0 | 1 | 7 | 3 | 1 | 0 |
| 16:15 | 0 | 0 | 2 | 4 | 3 | 0 |
| 16:30 | 0 | 0 | 4 | 3 | 0 | 1 |
| 16:45 | 0 | 0 | 3 | 0 | 0 | 0 |
| 17:00 | 0 | 0 | 0 | 1 | 2 | 0 |
| 17:15 | 0 | 0 | 0 | 1 | 0 | 0 |
| As % of total activities | 2.8% | 3.4% | 48.8% | 35.1% | 8.8% | 1.0% |

1. MSW activities

| Time-Block | Administrative work (AD) | Coordination & Communication (CC) | Direct patient care (DC) | Indirect clinical work (IND) | Travel (TR) | Waiting (WW) |
| --- | --- | --- | --- | --- | --- | --- |
| 8:30 | 8 | 1 | 0 | 4 | 0 | 0 |
| 9:00 | 2 | 2 | 1 | 10 | 0 | 0 |
| 9:15 | 1 | 1 | 0 | 14 | 0 | 0 |
| 9:30 | 1 | 2 | 0 | 14 | 0 | 1 |
| 9:45 | 0 | 4 | 0 | 10 | 1 | 1 |
| 10:00 | 0 | 1 | 2 | 9 | 1 | 2 |
| 10:15 | 1 | 2 | 3 | 13 | 3 | 0 |
| 10:30 | 0 | 3 | 14 | 4 | 1 | 0 |
| 10:45 | 1 | 0 | 10 | 7 | 1 | 1 |
| 11:00 | 0 | 2 | 8 | 3 | 2 | 1 |
| 11:15 | 0 | 2 | 3 | 5 | 0 | 1 |
| 11:30 | 0 | 2 | 5 | 3 | 1 | 0 |
| 11:45 | 1 | 3 | 4 | 6 | 2 | 0 |
| 12:00 | 0 | 3 | 6 | 5 | 3 | 1 |
| 12:15 | 0 | 1 | 7 | 5 | 2 | 0 |
| 12:30 | 0 | 1 | 11 | 2 | 1 | 0 |
| 12:45 | 0 | 0 | 5 | 3 | 4 | 0 |
| 13:00 | 1 | 1 | 5 | 3 | 1 | 0 |
| 13:15 | 0 | 0 | 11 | 3 | 3 | 0 |
| 13:30 | 1 | 0 | 7 | 3 | 2 | 0 |
| 13:45 | 1 | 1 | 4 | 3 | 2 | 2 |
| 14:00 | 0 | 2 | 6 | 0 | 0 | 2 |
| 14:15 | 0 | 0 | 16 | 3 | 1 | 1 |
| 14:30 | 0 | 1 | 15 | 2 | 4 | 0 |
| 14:45 | 0 | 2 | 5 | 3 | 1 | 0 |
| 15:00 | 0 | 0 | 13 | 1 | 0 | 0 |
| 15:15 | 1 | 0 | 8 | 3 | 6 | 2 |
| 15:30 | 0 | 1 | 7 | 5 | 4 | 0 |
| 15:45 | 0 | 0 | 14 | 4 | 0 | 1 |
| 16:00 | 0 | 2 | 19 | 1 | 1 | 0 |
| 16:15 | 0 | 0 | 8 | 2 | 1 | 0 |
| 16:30 | 0 | 0 | 7 | 5 | 3 | 1 |
| 16:45 | 0 | 1 | 6 | 2 | 2 | 0 |
| 17:00 | 0 | 0 | 5 | 9 | 0 | 0 |
| 17:15 | 1 | 0 | 4 | 5 | 0 | 0 |
| 17:30 | 1 | 1 | 5 | 2 | 0 | 0 |
| 17:45 | 0 | 0 | 0 | 2 | 0 | 0 |
| As % of total activities | 3.8% | 7.6% | 44.0% | 32.1% | 9.5% | 3.1% |

1. Nurses activities

| Time-Block | Administrative work (AD) | Coordination & Communication (CC) | Direct patient care (DC) | Indirect clinical work (IND) | Travel (TR) | Waiting (WW) |
| --- | --- | --- | --- | --- | --- | --- |
| 8:30 | 14 | 0 | 0 | 7 | 0 | 0 |
| 8:45 | 0 | 0 | 0 | 5 | 0 | 0 |
| 9:00 | 0 | 1 | 0 | 3 | 0 | 0 |
| 9:15 | 0 | 4 | 0 | 8 | 0 | 0 |
| 9:30 | 0 | 13 | 2 | 30 | 0 | 0 |
| 9:45 | 0 | 14 | 4 | 24 | 2 | 1 |
| 10:00 | 0 | 8 | 5 | 29 | 2 | 2 |
| 10:15 | 1 | 7 | 4 | 27 | 5 | 2 |
| 10:30 | 1 | 2 | 19 | 20 | 6 | 0 |
| 10:45 | 0 | 10 | 18 | 19 | 8 | 2 |
| 11:00 | 0 | 4 | 35 | 15 | 5 | 0 |
| 11:15 | 0 | 6 | 41 | 13 | 5 | 0 |
| 11:30 | 0 | 3 | 52 | 17 | 4 | 1 |
| 11:45 | 0 | 0 | 32 | 12 | 4 | 2 |
| 12:00 | 0 | 2 | 18 | 10 | 9 | 5 |
| 12:15 | 0 | 2 | 11 | 6 | 7 | 2 |
| 12:30 | 0 | 2 | 30 | 5 | 6 | 0 |
| 12:45 | 0 | 2 | 15 | 10 | 2 | 0 |
| 13:00 | 0 | 0 | 7 | 3 | 6 | 0 |
| 13:15 | 0 | 3 | 10 | 2 | 4 | 1 |
| 13:30 | 0 | 1 | 32 | 7 | 5 | 0 |
| 13:45 | 0 | 2 | 23 | 15 | 5 | 1 |
| 14:00 | 0 | 4 | 13 | 15 | 6 | 0 |
| 14:15 | 1 | 3 | 17 | 13 | 8 | 0 |
| 14:30 | 0 | 5 | 31 | 7 | 6 | 1 |
| 14:45 | 0 | 1 | 30 | 13 | 3 | 0 |
| 15:00 | 0 | 3 | 42 | 16 | 1 | 1 |
| 15:15 | 0 | 4 | 29 | 16 | 5 | 0 |
| 15:30 | 1 | 5 | 26 | 24 | 6 | 0 |
| 15:45 | 0 | 6 | 18 | 12 | 3 | 1 |
| 16:00 | 1 | 5 | 16 | 14 | 2 | 1 |
| 16:15 | 0 | 3 | 11 | 12 | 2 | 0 |
| 16:30 | 0 | 5 | 7 | 16 | 2 | 1 |
| 16:45 | 1 | 4 | 3 | 12 | 1 | 0 |
| 17:00 | 0 | 3 | 5 | 9 | 2 | 0 |
| 17:15 | 1 | 0 | 0 | 0 | 1 | 0 |
| 17:30 | 0 | 0 | 0 | 7 | 0 | 0 |
| As % of total activities | 1.5% | 9.8% | 43.5% | 33.9% | 9.5% | 1.7% |
